# Supplementary material for: Procoagulant Activity in Amniotic Fluid Is Associated with Fetal-Derived Extracellular Vesicles
Source: MDPI journal article supplement (doi:10.3390/cimb44060185), 2022-06-13
Supplement: s1 [file s1]

# Supplemental Information

Figure S1

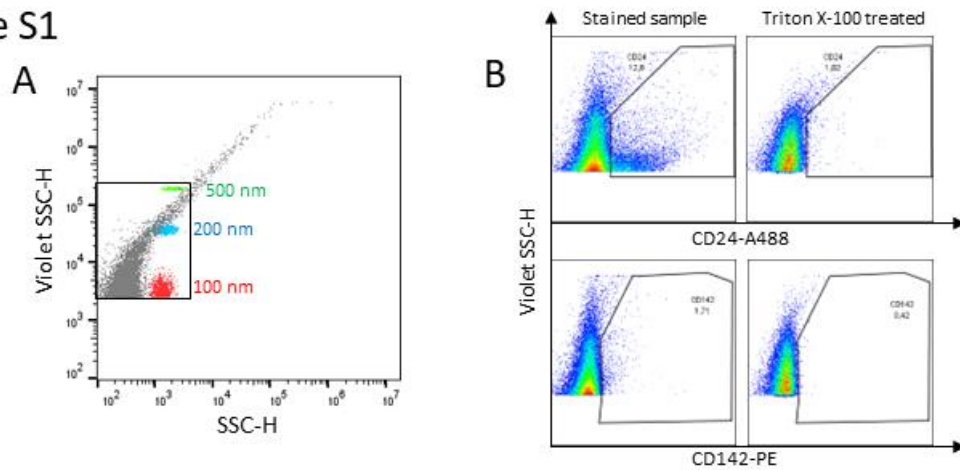

Figure S1. Representative flow cytometry results plots describing the gating strategy and EV confirmation test. (A) Representative plot with population of different size-control beads (colored) overlaying amniotic fluid EV population (gray). (B) Representative plots of amniotic fluid sample stained with anti-CD24 and anti-CD142 antibodies. Triton X-100 treatment was used to lyse all enclosed EVs and provide negative control.
